1 **Title:** Sensorimotor expectations bias motor resonance during observation of object lifting: The causal  
2 role of pSTS

3 **Abbreviated title:** Motor resonance depends on object weight expectations

4  
5 Guy Rens<sup>1,2\*</sup>, Vonne van Polanen<sup>1,2</sup>, Alessandro Botta<sup>3</sup>, Mareike A. Gann<sup>1,2</sup>, Jean-Jacques Orban de  
6 Xivry<sup>1,2</sup>, Marco Davare<sup>2,4</sup>

7  
8 <sup>1</sup>Movement Control and Neuroplasticity Research Group, Department of Movement Sciences,  
9 Biomedical Sciences group, KU Leuven, 3001 Leuven, Belgium

10 <sup>2</sup>KU Leuven, Leuven Brain Institute, 3001 Leuven, Belgium

11 <sup>3</sup>Department of Experimental Medicine, Section of Human Physiology, University of Genoa, 16132  
12 Genoa, Italy

13 <sup>4</sup>Department of Clinical Sciences, College of Health and Life Sciences, Brunel University London, UB8 3PN  
14 Uxbridge, United Kingdom

15  
16 **\*Corresponding Author:**

17 Guy Rens  
18 Department of Movement Sciences  
19 KU Leuven  
20 Tervuursevest 101,  
21 3001 Leuven, Belgium  
22 [Guy.Rens@kuleuven.be](mailto:Guy.Rens@kuleuven.be)

23  
24 **Amount of pages:** 32

25 **Amount of figures:** 7

26 **Amount of tables:** 1

27 **Amount of words in abstract:** 201

28 **Amount of words in introduction:** 649

29 **Amount of words in discussion:** 1494

30 **Acknowledgements:** GR is a doctoral student funded by a Research Foundation Flanders (FWO)  
31 Odysseus Project (Fonds Wetenschappelijk Onderzoek, Belgium; grant: G/OC51/13N) awarded to MD.  
32 VVP is funded by an FWO post-doctoral fellowship (grant: 12X7118N). MAG was supported by FWO  
33 Research Foundation (Grants G099516N)

34 **Conflict of interest:** The authors declare to have no conflict of interest

35 **Abstract**

36 Transcranial magnetic stimulation (TMS) studies have highlighted that corticospinal excitability (CSE) is  
37 increased during observation of object lifting, an effect termed as ‘motor resonance’. This facilitation is  
38 driven by parameters indicative of object weight, such as object size or observed movement kinematics.  
39 Here, we investigated how motor resonance is altered when the observer’s weight expectations, based  
40 on visual information, do not match the actual object weight as revealed by the observed movement  
41 kinematics. Our results highlight that motor resonance is not robustly driven by object weight but easily  
42 masked by a suppressive ‘expectation monitoring mechanism’ when weight expectations can be  
43 incorrect. Subsequently, we investigated whether this expectation monitoring mechanism was driven by  
44 higher-order cortical areas. For this, we induced ‘virtual lesions’ to either the posterior superior temporal  
45 sulcus (pSTS) or dorsolateral prefrontal cortex (DLPFC) prior to having participants perform the task.  
46 Importantly, virtual lesion of pSTS eradicated the expectation monitoring mechanism and restored  
47 object-weight driven motor resonance. In addition, DLPFC virtual lesion eradicated any modulation of  
48 motor resonance. This indicates that motor resonance is heavily mediated by top-down inputs from both  
49 pSTS and DLPFC. Altogether, these findings shed new light on the theorized cortical network driving CSE  
50 modulation during action observation.

51

52 **Significance Statement**

53 Observation of object lifting activates the observer’s motor system in a weight-specific fashion:  
54 Corticospinal excitability is larger when observing lifts of heavy objects compared to light ones.  
55 Interestingly, here we demonstrate that this weight-driven modulation of corticospinal excitability is  
56 easily suppressed by the observer’s expectations about object weight and that this suppression is  
57 mediated by the posterior superior temporal sulcus. Thus, our findings show that modulation of  
58 corticospinal excitability during observed object lifting is not robust but easily altered by top-down  
59 cognitive processes. Finally, our results also indicate how cortical inputs, originating remotely from  
60 motor pathways and processing action observation, overlap with bottom-up motor resonance effects.

## 61 **Introduction**

62 Over two decades ago, Fadiga et al. (1995) demonstrated for the first time the involvement of the  
63 human motor system in action observation: By applying single pulse transcranial magnetic stimulation  
64 (TMS) over the primary motor cortex (M1), they revealed that corticospinal excitability (CSE) was  
65 similarly modulated during the observation and execution of the same action. In line with the mirror  
66 neuron theory, they argued that the motor system could be involved in action understanding by bottom-  
67 up mapping ('mirroring') observed actions onto the cortical areas that are involved in their execution (for  
68 a review see: Rizzolatti et al., 2014). Consequently, action observation-driven modulation of CSE has  
69 been termed 'motor resonance'.

70 Recently, TMS studies in humans substantiated that motor resonance reflects parameters within  
71 the observed action. For example, Alaerts et al. (2010a, 2010b) demonstrated that motor resonance  
72 during observed object lifting is modulated by parameters indicative of object weight, such as intrinsic  
73 object properties (e.g. size), muscle contractions and movement kinematics. Specifically, CSE is facilitated  
74 when observing lifts of heavy compared to light objects. Interestingly, in a later study Alaerts et al. (2012)  
75 demonstrated that CSE is already modulated by weight during the reaching phase, suggesting a  
76 predictive mechanism underlying motor resonance as well.

77 However, it is important to note that these motor resonance effects do not seem to be robust.  
78 For instance, Buckingham et al. (2014) demonstrated, using the size-weight illusion, that modulation of  
79 CSE is driven by object size when observing skilled but not erroneous lifts. In addition, Senot et al. (2011)  
80 demonstrated that motor resonance based on object weight is eradicated when two objects with  
81 identical appearance but different weights are labelled the same. Lastly, Tidoni et al. (2013)  
82 demonstrated that motor resonance is altered by the intentions conveyed by the observed person as  
83 well. That is, when the actor pretended to lift a light object as if it was heavy (i.e. 'deceptive lift'), motor  
84 resonance was significantly facilitated compared to when the actor lifted the light object 'truthfully'.  
85 Although the above studies experimentally manipulated the information participants perceived, they  
86 could not investigate whether the participants' expectations changed and to which extent this altered  
87 CSE modulation.

88 In the present study, we wanted to probe whether the observer's expectations alter motor  
89 resonance by changing the experimental context. We asked participants to perform an object lifting task  
90 in turns with an actor. One group performed the task using objects with congruent only size-weight  
91 relationship (i.e. big-heavy or small-light objects) whereas the other group lifted objects with both  
92 congruent and incongruent properties (i.e. big-heavy, small-light and big-light, small-heavy objects).

93 Based on Alaerts et al. (2010b, 2012) findings, we hypothesized that motor resonance would be driven  
94 by (i) the intrinsic object properties (i.e. size) before the observed object lift-off and (ii) the movement  
95 kinematics (i.e. actual object weight) during observed lifting. However, our results revealed that, for the  
96 group lifting objects with both congruent and incongruent size-weight relationships, motor resonance  
97 was suppressed by an ‘expectation monitoring mechanism’ caused by the presence of incongruent  
98 objects.

99 We carried out a second experiment to investigate whether motor resonance was suppressed by  
100 top-down inputs to the motor system. We asked another group of participants to perform the same task  
101 after receiving a virtual lesion of either the posterior superior temporal sulcus (pSTS) or dorsolateral  
102 prefrontal cortex (DLPFC). We opted for these areas considering their involvement in understanding  
103 intentions and motor goals [DLPFC: Miller and Cohen, (2001), Kilner (2012); pSTS: Nelissen et al. (2011)]  
104 as well as recognizing action correctness [DLPFC: Pazzaglia et al. (2008); pSTS: Pelphrey et al. (2004)].  
105 Because pSTS is reciprocally connected with the anterior intraparietal cortex (AIP) (Nelissen et al., 2011)  
106 and DLPFC with the ventral premotor cortex (PMv) (Badre and D’Esposito, 2009), which are considered  
107 key nodes for driving motor resonance (Rizzolatti et al., 2014), we hypothesized that virtual lesion of  
108 either region would release the ‘suppression’ and restore weight-driven motor resonance.

109

## 110 **Methods**

### 111 Participants

112 68 participants were recruited from the student body of KU Leuven (Belgium) and divided into four  
113 groups. 9 individuals were excluded prior to participation based on screening for TMS (Rossi et al., 2011)  
114 and/or MRI safety (checklist of local hospital: UZ Leuven). For experiment 1, 18 individuals (12 females;  
115 mean age  $\pm$  SEM = 23.78  $\pm$  0.12 years) were assigned to the control group and 17 (11 females; mean age  
116  $\pm$  SEM = 24.63  $\pm$  0.14 years) to the baseline group. For the second experiment, 24 individuals were  
117 separated into two groups. Prior to performing the experimental task, 12 participants received virtual  
118 lesioning of DLPFC (5 females; mean age  $\pm$  SEM = 24.04  $\pm$  0.23 years) and the other 12 received virtual  
119 lesioning of pSTS (9 females; mean age  $\pm$  SEM = 22.54  $\pm$  0.18 years). The Edinburgh Handedness  
120 Questionnaire (Oldfield, 1971) revealed that all participants were strongly right-handed (> 90). All  
121 participants had normal or corrected-to-normal vision, were free of neurological disorders and had no  
122 motor impairments of the right upper limb. Participants gave written informed consent and were  
123 financially compensated for their time. The protocol was in accordance with the Declaration of Helsinki  
124 and was approved by the local ethical committee of KU Leuven, Belgium (Project s60072).

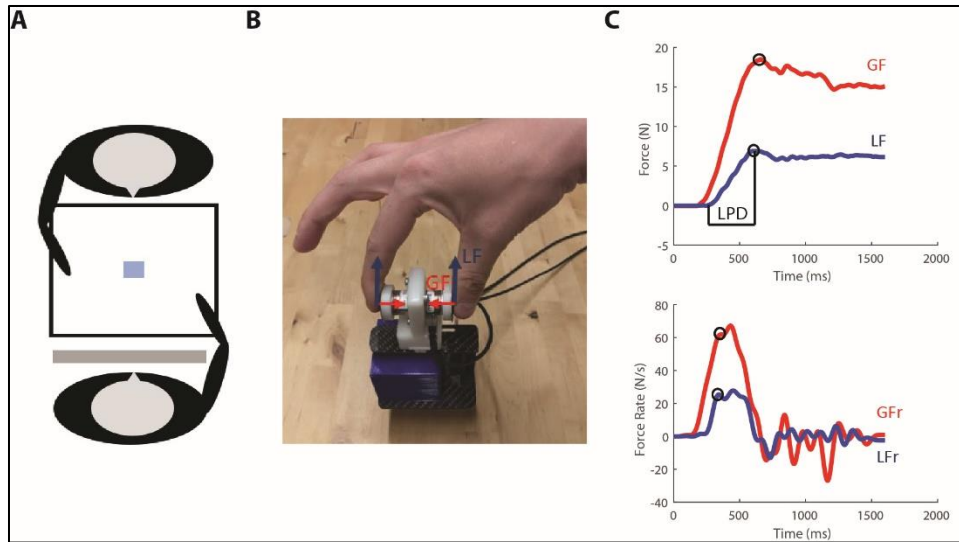

**Figure 1. Experimental set-up.** **A.** Representation of the experimental set-up: the participant and actor were seated opposite to each other in front of a table on which the manipulandum was positioned. A switchable screen was placed in front of the participant's face. **B.** Photo of the grip-lift manipulandum used in the experiment. Load force (LF: blue) and grip force (GF: red) vectors are indicated. **C.** GF and LF typical traces (upper) and their derivatives (lower) for a skilled lift. Circles denote first peak values used as parameters. Loading phase duration (LPD) was defined as the delay between object contact (GF > 0.20 N) and object lift off (LF > 0.98\*object weight).

125 Experimental set-up

126 *Experimental task.* Subject and actor were comfortably seated opposite to each other in front of a table  
127 (for the experimental set-up see: figure 1A). Participants were required to grasp and lift the

128 manipulandum (see: 'acquisition of force data') that was placed in front of them in turns with the actor.

129 As such, one trial consisted of one lifting action performed by either the actor ('actor trial') or the

130 participant ('participant trial'). Prior to the start of the task, participants received two practice trials on

131 the objects with a congruent size-weight relationship ('congruent objects') but not on those with an

132 incongruent relationship ('incongruent objects'; for an explanation see: 'acquisition of force data').

133 Participants also received the following instructions beforehand: (1) Lift the manipulandum to a height of

134 approximately 5 cm at a smooth pace that is natural to you. (2) Only place thumb and index finger on the

135 graspable surfaces (precision grip). (3) The cube in your trial always matches the cube in the actor's

136 preceding trial both in size and weight. As such, participants always lifted the exact same cube as the

137 actor did in the preceding trial and could rely on lift observation to estimate object weight for their own

138 trials (Rens and Davare, 2019). Finally, both participants and actor were asked to place their hand on a

139 predetermined location on their side of the table to ensure consistent reaching throughout the

140 experiment. Reaching distance was approximately 25 cm and required participant and actor to use their

141 entire right upper limb to reach for the manipulandum. Lastly, participants were not informed about the  
142 incongruent objects prior to the start of the experiment.

143 For experiment 1 (control and baseline groups), each trial performed by the actor or the  
144 participant was initiated with a neutral sound cue ('start cue'). For experiment 2 (DLPFC and pSTS  
145 groups), we removed the start cue as we applied TMS during participant trials as well (see the 'TMS  
146 procedure and EMG recording' section for the stimulation conditions; see the 'Experimental groups'  
147 paragraph below for the inter-group differences). Accordingly, participants in experiment 2 were  
148 instructed to consider the TMS pulse as the start cue and only initiate their movement after TMS was  
149 applied. For all groups, trials lasted 4 s to ensure that participants and actor had enough time to reach,  
150 grasp and lift the manipulandum smoothly at a natural pace. Inter-trial interval was approximately 5 s  
151 during which the cuboid in the manipulandum could be changed. A transparent switchable screen (Magic  
152 Glass), placed in front of the participant's face, became transparent at trial onset and turned back to  
153 opaque at the end of the trial. The screen remained opaque during the inter-trial interval to ensure  
154 participants had no vision on the cube switching. The actor always performed the act of changing the  
155 cuboid before executing his trials (even if the same cube would be used twice in a row). This was done to  
156 ensure that participants could not rely on sound cues to predict cube weight in the actor's upcoming  
157 trial. Switching actions were never performed before participant trials as they were explained that their  
158 cube would always match that of the actor.

159 *Experimental procedure.* All participants performed the object lifting task in a single session  
160 ('experimental session'). Moreover, participants of experiment 2 underwent prior MRI scanning (session  
161 duration: 30 min) on a different day. At the start of the experimental session (start of scanning session  
162 for the participants of experiment 2), participants gave written informed consent and were prepared for  
163 TMS stimulations as described below. Afterwards participants performed the experimental task (for the  
164 amount of trials per group see: table 1). For the baseline group, the total amount of trials was divided  
165 over four experimental blocks. Participants in the control, DLPFC and pSTS groups performed two  
166 experimental blocks. The proportion of trials on each cube was equal in all blocks and participants  
167 received a short break between blocks. Lastly, the experimental session lasted 60 minutes for the control  
168 group and 90 minutes for the baseline, DLPFC and pSTS groups. Differences in session duration between  
169 the groups resulted from differences in TMS preparation and the amount of trials per group.

170 *Experimental groups.* In experiment 1, we wanted to investigate whether the presence of  
171 incongruent objects alters motor resonance. For this, we divided participants into two groups, which  
172 were the control and baseline group. Participants in the control group were only exposed to the

173 congruent objects. In contrast, participants in the baseline group lifted both the congruent and  
 174 incongruent objects during the task. Importantly, as we wanted the baseline group to anticipate that the  
 175 object's size and weight were congruent, we decided to use unequal proportions of congruent and  
 176 incongruent trials (33 % of trials were incongruent; see discussion for limitations) (table 1).

**Table 1. Amount of trials per observational condition for each of the four experimental groups**

|       | TMS applied | Congruent lifts<br>(per person per weight) |                  |                         | Incongruent lifts<br>(per person per weight) |                  |                         | Total amount of trials | Ratio of incongruent trials |
|-------|-------------|--------------------------------------------|------------------|-------------------------|----------------------------------------------|------------------|-------------------------|------------------------|-----------------------------|
|       |             | none                                       | observed contact | after observed lift-off | none                                         | observed contact | after observed lift-off |                        |                             |
| Group | Control     | 6                                          | 18               | 18                      | /                                            | /                | /                       | 168                    | /                           |
|       | Baseline    | 16                                         | 16               | 16                      | /                                            | 12               | 12                      | 288                    | 33 %                        |
|       | DLPFC       | 12                                         | /                | 24                      | /                                            | /                | 12                      | 192                    | 25 %                        |
|       | pSTS        | 12                                         | /                | 24                      | /                                            | /                | 12                      | 192                    | 25 %                        |

**Table 1. Distribution of trials per observational condition.** In order to reach the full amount of trials, each amount has to be two times multiplied by two. Once for the participants (as trials only reflect observed trials) and once for the two weights (heavy and light) that have been used. For example: participants in the control experiment only performed lifts on the congruent cubes. During observation (actor trials), TMS was not applied in 6 trials, applied at observed object contact (18 trials) or after observed lift-off (18 trials). Accordingly, participants observed 42 lifts (all timings combined) for one congruent cube. Considering that we used two congruent cubes, participants observed 82 trials in total. Moreover, as participants performed the task in alternation with the actor, they also performed 82 trials. As a result, during the experimental session of a participant in the control group, 168 trials in total were performed.

177 In experiment 2, we wanted to investigate how pSTS and DLPFC are causally involved in  
 178 mediating the suppressive mechanism revealed in experiment 1. Participants performed the same task  
 179 as the baseline group of experiment 1 after receiving a virtual lesion over either pSTS or DLPFC.  
 180 Compared to the baseline group, participants performed approximately 100 trials less due to time  
 181 constraints related to the procedure used to induce the virtual lesion (Huang et al., 2005). We also  
 182 reduced the proportion of incongruent trials (25 % of trials were incongruent; table 1) to ensure they  
 183 appeared at a reduced absolute frequency in order to have participants maintain their size-weight  
 184 expectations. Arguably, the different proportions of erroneous trials should not affect CSE modulation  
 185 differently: Pezzetta et al. (2018) demonstrated, using electro-encephalography (EEG), that errors rather  
 186 than their probability elicit typical error-related cortical activation. Moreover, if the suppressive  
 187 mechanism would be rather driven by the relative frequency of the error occurrence than by the error  
 188 itself, then the effects of the suppressive mechanism on CSE modulation should be enhanced rather than  
 189 decreased with a lower proportion of incongruent trials.

190

191

## 192 Acquisition of force data

193 A grip-lift manipulandum consisting of two 3D force-torque sensors was attached to a custom-  
194 made carbon fibre basket in which different objects could be placed (for an image of the manipulandum  
195 see: figure 1B). The total weight of the manipulandum was 1.2 N. The graspable surface (17 mm  
196 diameter and 45 mm apart) of the force sensors was covered with fine sandpaper (P600) to increase  
197 friction. For the present experiment, we used four 3D-printed objects. The large objects (cuboids) were  
198 5x5x10 cm in size whereas the two small ones (cubes) measured 5x5x5 cm. Two of the objects, one small  
199 and one large, were filled with lead particles so each of them weighted 0.3 N. The other two were filled  
200 with lead particles until each of them weighted 5 N. Combined with the weight of the manipulandum,  
201 the light and heavy objects weighted 1.5 and 6.3 N respectively. Importantly, using these four objects,  
202 we had a two by two design with size (small or big) and weight (light or heavy) as factors. In addition, this  
203 design allowed us to have two objects that were ‘congruent’ in size and weight (large objects are  
204 expected to be heavier than smaller ones of the same material) and two ‘incongruent’ objects for which  
205 this size-weight relationship was inversed (Baugh et al., 2012). To exclude any visual cues indicating  
206 potential differences between the same-sized objects, they were hidden under the same paper covers. In  
207 the present study, we used two ATI Nano17 F/T sensors (ATI Industrial Automation, USA). Both F/T  
208 sensors were connected to the same NI-USB 6221 OEM board (National Instruments, USA) which was  
209 connected to a personal computer. Force data was acquired at 1000 Hz using a custom-written Labview  
210 script (National Instruments, USA). Lastly, one of the authors G. Rens served as the actor in both  
211 experiment 1 and 2.

212

## 213 TMS procedure and EMG recording

214 *General procedure.* For all groups, electromyography (EMG) recordings were performed using Ag-AgCl  
215 electrodes which were placed in a typical belly-tendon montage over the right first dorsal interosseous  
216 muscle (FDI). A ground electrode was placed over the processus styloideus ulnae. Electrodes were  
217 connected to a NL824 AC pre-amplifier (Digitimer, USA) and a NL820A isolation amplifier (Digitimer, USA)  
218 which in turn was connected to a micro140-3 CED (Cambridge Electronic Design Limited, England). EMG  
219 recordings were amplified with a gain of 1000 Hz, high-pass filtered with a frequency of 3 Hz, sampled at  
220 3000 Hz using Signal software (Cambridge Electronic Design Limited, England) and stored for offline  
221 analysis. For TMS stimulation, we used a DuoMAG 70BF coil connected to a DuoMAG XT-100 system  
222 (DEYMED Diagnostic, Czech Republic). For M1 stimulation, the coil was tangentially placed over the  
223 optimal position of the head (hotspot) to induce a posterior-anterior current flow and to elicit motor



224 evoked potentials (MEPs) in right FDI. The hotspot was marked on the scalp of each participant.  
225 Stimulation intensity (1 mV threshold) for each participant was defined as the lowest stimulation  
226 intensity that produced MEPs greater than 1 mV in at least four out of eight consecutive trials when  
227 stimulating at the predetermined hotspot. Lastly, the control group and baseline group received 12  
228 stimulations at the 1 mV threshold before and after the experiment to have a baseline measure of  
229 resting CSE. Moreover, for the baseline group, we also recorded a baseline measure of resting CSE  
230 halfway through the experiment (i.e. when participants had performed half of the experimental blocks)  
231 as their experimental session lasted 30 min longer.

232 *Stimulation during the experimental task.* For the control and baseline group, TMS was applied  
233 during the actor trials at two different timings: at object contact and during the lifting phase (see ‘Data  
234 processing’ for their definitions). Participants did not receive stimulations during their trials (i.e.  
235 participant trials). For the DLPFC and pSTS groups, TMS was applied during both the actor and participant  
236 trials. During observation we only applied TMS during the observed lifting phase, and not at observed  
237 contact for two reasons: (1) The results from experiment 1 indicated that CSE was primarily modulated  
238 during observed lifting and (2) because of the time constraints related to the duration of the after-effects  
239 caused by cTBS (Huang et al., 2005), which are limited to about an hour. During participant trials, TMS  
240 was applied  $400 \pm 100$  ms (jitter) after object presentation. As participants were instructed to only start  
241 lifting after receiving the stimulation, it was applied during movement planning and not execution. We  
242 did not stimulate the control and baseline groups during lift planning because initially we were only  
243 interested in motor resonance. We did include these stimulations in experiment 2, because we wanted  
244 to investigate the effect of a virtual lesion of DLPFC or pSTS on this inhibition during motor planning.  
245 Finally, in experiment 1 (control and baseline groups) we did not use neuro-navigation but relied on the  
246 hotspot mark on the scalp to stimulate M1 during the experiment. In contrast, for experiment 2 (DPLFC  
247 and pSTS groups) we used neuro-navigation for applying cTBS but also for maintaining the same coil  
248 positioning and orientation during the experiment. Accordingly, for experiment 2, the hotspot was  
249 determined using the same procedures as in experiment 1, although the M1 stimulations during the  
250 experiment were neuro-navigated. However, this should not have affected the validity of our between-  
251 group differences (for example see: Jung et al., 2010).

252 *Additional procedures for experiment 2.* After defining the 1 mV threshold, we defined  
253 the active motor threshold (aMT) as the lowest stimulation intensity that produced MEPs that were  
254 clearly distinguishable from background EMG during a voluntary contraction of about 20 % of their  
255 maximum using visual feedback. Before the experimental task, participants received cTBS over either

256 DLPFC or pSTS. cTBS consisted of bursts of 3 pulses at 50 Hz, repeated with a frequency of 5 Hz and at an  
257 intensity of 80 % of the aMT for 40 s (600 pulses in total). It has been considered that this type of  
258 repetitive stimulation disrupts activity within the stimulation region for a period up to 60 minutes (Huang  
259 et al., 2005). Consequently, it has often been termed a ‘virtual lesion’. In experiment 2, we also collected  
260 resting CSE before cTBS. As such, we recorded three resting CSE measurements, i.e. pre-cTBS, pre-task (5  
261 minutes after cTBS ended and just before the start of the experimental task) and post-task. To ensure  
262 that cTBS was applied on the desired stimulation area, a high-resolution structural T1-weighted  
263 anatomical image of each participant was acquired with a magnetization-prepared rapid-acquisition  
264 gradient-echo (MPRAGE) sequence (Philips Ingenia 3.0T CX, repetition time/echo time = 9.72/4.60 ms;  
265 voxel size = 1.00 X 1.00 X 1.00 mm<sup>3</sup>; field of view = 256 X 256 X 192 mm<sup>3</sup>; 192 coronal slices) which was  
266 co-registered during the experiment with the fiducial landmarks using a Brainsight TMS neuronavigation  
267 system (Rogue Research, Canada).

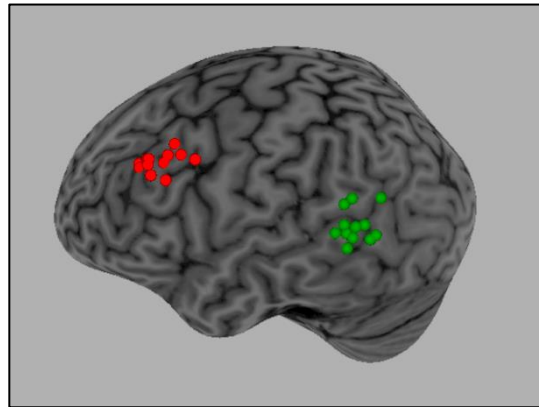

**Figure 2. Stimulation sites.** Anatomical locations where cTBS was applied for each individual subject of the DLPFC (red) and pSTS (green) groups.

268 DLPFC was anatomically identified following Mylius et al. (2013). Briefly, we identified the  
269 superior and inferior frontal sulci as the superior and inferior borders of the middle frontal gyrus (MFG).  
270 The posterior border was defined as the precentral sulcus and the frontal one as the anterior  
271 termination of the olfactory sulcus in the coronal plane. Lastly, the MFG was divided equally into three  
272 parts and the separating line between the anterior and middle thirds was defined as the DLPFC (for full  
273 details see: Mylius et al., 2013). We always defined DLPFC within the middle frontal sulcus (MFS). This  
274 allowed us to consistently target the MFS using the same coil orientation across participants. Coil  
275 orientation was perpendicular to the MFS with the handle pointing downwards. pSTS was anatomically  
276 defined following Cattaneo et al. (2010) and Arfeller et al. (2013) as the middle between the caudal and

277 rostral ends of the ascending branch of STS, just below the intraparietal sulcus. Coil orientation was  
278 perpendicular to pSTS with the handle pointing downwards. The means  $\pm$  SEM of Talarach coordinates  
279 for these sites were as follows: left DLPFC:  $X = -38.14 \pm 0.93$ ,  $Y = 23.53 \pm 1.64$ ,  $Z = 32.29 \pm 0.80$ ; left pSTS:  
280  $X = -54.03 \pm 1.09$ ,  $Y = -49.86 \pm 1.32$ ,  $Z = 9.35 \pm 1.22$  as estimated on the cortical surface (For stimulation  
281 locations see: figure 2) which are in line with previous studies [left DLPFC:  $X = -42.17 \pm 5.07$ ,  $Y = -33.73 \pm$   
282  $5.73$ ,  $Z = 32.36 \pm 6.17$  Mylius et al. (2013); left pSTS:  $X = -51.6 \pm 3.6$ ,  $Y = -43.2 \pm 7.1$ ,  $Z = 7.1 \pm 6.4$  Arfeller  
283 et al. (2013)]

284

### 285 Data processing

286 *Force data.* Data collected with the F/T sensors were low-pass filtered with a fifth-order Butterworth  
287 filter (forces cut-off frequency: 30 Hz, force rates cut-off frequency: 15 Hz). A custom script was written  
288 in MATLAB to compute the following variables: (1) Grip (GF) and load (LF) forces, which were defined as  
289 the exerted force perpendicular and tangential to the normal force, respectively (figure 1B). GF and LF  
290 were computed as the sum of the respective force components exerted on both sensors. Additionally,  
291 grip and load force rates (GFr and LFr) were computed by taking the first derivative of GF and LF  
292 respectively. We report not GF and LF but their rates (figure 1C) as it has been demonstrated that force  
293 rate parameters are a reliable indicator of predictive force scaling (Johansson and Westling, 1988b;  
294 Gordon et al., 1991). For analyses purposes of the force parameters, we decided to use the first peak grip  
295 and load force rate values after object contact that were at least 30 % of the maximum peak rate. This  
296 threshold was used to exclude small peaks in the force rates due to noise or small bumps caused by  
297 lightly contacting the F/T sensors. In addition, we decided to use the first peak force rate values as later  
298 peak values might be contaminated with feedback mechanisms and not reflect predictive force planning  
299 (Castiello, 2005; Rens and Davare, 2019). Accordingly, using the peak force rates enabled us to  
300 investigate whether participants scaled their fingertips forces differently for the incongruent and  
301 congruent objects. Besides peak force rates, we also report the loading phase duration (LPD) which was  
302 defined as the latency between object contact and lift off. Object contact and lift-off were defined as the  
303 time points when GF exceeded 0.2 N and LF exceed 0.98 x object weight (figure 1C), respectively. We  
304 included LPD as it is considered an estimator of the lifting speed [e.g. the shorter the LPD the faster the  
305 object will be lifted: Johansson and Westling (1988a)], which is a movement parameter used by  
306 participants to estimate object weight (Hamilton et al., 2007). Moreover, we could also use this  
307 parameter to investigate the participants' lifting performance. Lastly, both force rate parameters and  
308 LPD were z-score normalized. For the participants, z-score normalization was done for each participant

309 separately. For the actor, z-score normalization was also done for each ‘participant’ separately. That is,  
310 the actor’s lifting performance in one session (as observed by one participant) was z-score normalized  
311 against the data of only that session. We decided to normalize our data based on the assumption that  
312 the actor’s lifting speed might vary and this might affect the participants’ lifting speed as well.  
313 Accordingly, z-score normalization would enable us compare between-group differences (Rens and  
314 Davare, 2019).

315 *EMG data.* From the EMG recordings, we extracted the peak-to-peak amplitudes of the MEP  
316 using a custom-written MATLAB script. All EMG recordings were visually inspected for background noise  
317 related to muscle contractions. Moreover, trials were excluded when the MEP was visibly contaminated  
318 (i.e. spikes in background EMG) or when an automated analysis found that the average background EMG  
319 was larger than 50  $\mu\text{V}$  (root-mean-square error) in a time window of 200 ms prior to the TMS  
320 stimulation. Lastly, for each participant separately we excluded outliers which we defined as values  
321 exceeding the mean  $\pm 3$  SD’s. For each participant, all MEPs collected during the experimental task (but  
322 not resting measurements) were normalized with z-scores using their grand mean and standard  
323 deviation. For experiment 2, z-scoring was done for lift observation and planning separately.

324

### 325 Statistical analysis

326 *Corticospinal excitability during rest.* To investigate within-group differences in baseline CSE, we  
327 performed repeated measures analyses of variance (ANOVA<sub>RM</sub>) for the control and the baseline group  
328 separately with one within-factor RESTING STATE (control: pre- and post-task; baseline; pre-task,  
329 between experimental blocks, post-task). For experiment 2, we performed a mixed ANOVA with  
330 between-factor GROUP (DLPFC or pSTS) and within factor RESTING (pre-cTBS, pre-task, post-task).

331 *Within-group differences for corticospinal excitability during the experimental task.* First, to  
332 investigate whether our experimental task can elicit weight-driven motor resonance effects during lift  
333 observation, we performed a ANOVA<sub>RM</sub> on the control group only with within-factors CUBE (big heavy or  
334 small light) and TIMING (observed contact or after observed lift-off). To investigate whether the  
335 presence of the incongruent objects altered motor resonance, we used a general linear model (GLM; due  
336 to different effect sizes) to probe potential differences between the control and baseline groups on the  
337 congruent objects only. We used the between-factor GROUP (control or baseline) and within-factors  
338 CUBE and TIMING. Due to our findings, we followed up on this GLM with a ANOVA<sub>RM</sub>, only performed on  
339 the baseline group with within-factors TIMING, SIZE (big or small) and WEIGHT (heavy or light).

340 After these analyses on the groups of the first experiment, we investigated the potential effects  
341 of the virtual lesions of DLPFC and pSTS. For this, we performed a GLM with between-factor GROUP  
342 (baseline, DLPFC or pSTS) and within-factors SIZE and WEIGHT. As we did not stimulate the DLPFC and  
343 pSTS groups at observed contact, we could not include the within-factor TIMING. As we wanted to  
344 further explore potential within-group effects, we followed up on the GLM with separate ANOVA<sub>RMS</sub> for  
345 the DLPFC and pSTS groups with within-factors SIZE and WEIGHT. Finally, to explore potential differences  
346 between lift observation and planning for the groups of experiment 2, we performed a final GLM with  
347 between-factor GROUP (DLPFC or pSTS) and within-factors ACTION (observation or planning), SIZE and  
348 WEIGHT.

349 *Force parameters of the participants.* For each parameter of interest (peak GFr, peak LFr and  
350 LPD), we performed a GLM on the congruent objects only with between-factor GROUP (control, baseline,  
351 DLPFC or pSTS) and within-factor CUBE (big heavy or small light). We performed an additional GLM on  
352 the congruent and incongruent objects combined with between-factor GROUP (baseline, DLPFC or pSTS;  
353 control not included due to not using the incongruent objects) and within-factors SIZE and WEIGHT.  
354 Importantly, within-factors related to the timing of the TMS stimulation are not included here as our  
355 preliminary analyses indicated that it did not affect predictive force planning in the participants, i.e. we  
356 did not find significance for any of the relevant pairwise comparisons. Because of these findings, we  
357 decided to pool the data for TIMING and present the data as such for clarity.

358 *Force parameters of the actor.* For each parameter (peak GFr, peak LFr and LPD) we performed  
359 the same analyses as described in ‘Force parameters of the participants’. We did not include the within-  
360 factors related to timing as the actor was blinded to the timings during the experiment.

361 Lastly, for the GLMs we used type III sum of squares, comparisons of interest exhibiting  
362 statistically significant differences ( $p \leq 0.05$ ) were further analysed using the Holm-Bonferroni test. All  
363 data presented in the text are given as mean  $\pm$  standard error of the mean. All analyses were performed  
364 in STATISTICA (Dell, USA).

365

## 366 **Results**

367 In the present study, we investigated how motor resonance is modulated during lift observation. For  
368 this, participants performed an object lifting task in turns with an actor. The control group only lifted  
369 objects with a congruent size-weight relationship (i.e. ‘big heavy’ and ‘small light’ objects). The baseline  
370 group lifted objects with both congruent and incongruent size-weight relationships (i.e. additional ‘big  
371 light’ and ‘small heavy’ objects). The subject groups participating in experiment 2 (DLPFC and pSTS

372 groups) used the same objects as the baseline group. Importantly, they performed the experimental task  
373 after receiving a TMS induced virtual lesion over either DLPFC or pSTS. Only relevant main and  
374 interaction effects are reported below.

#### 375 Stimulation intensities

376 To examine differences between stimulation intensities of the different groups, we ran two GLMs to  
377 investigate group differences in 1 mV thresholds (all groups) and aMT (DLPFC and pSTS groups only). All  
378 values are expressed as a percentage of the maximal stimulator output. As expected, the GLM failed to  
379 reveal any significant difference between groups for the 1 mV stimulation intensity (control = 61 % ±  
380 2.62; baseline = 55.64 % ± 3.26; DLPFC = 57.54 % ± 3.26; pSTS = 50.46 % ± 3.00) ( $F_{(3,48)} = 2.39$   $p = 0.08$ ,  $\eta^2_p$   
381 = 0.13) as well as for the aMT (DLPFC = 42.82 % ± 2.26; pSTS = 38.46 % ± 2.08) ( $F_{(1,22)} = 2.01$   $p = 0.17$ ,  $\eta^2_p =$   
382 0.08). Note that the degrees of freedom of the error are lower due to missing values.

383 We informally asked participants in experiment 2 how they perceived cTBS. In the DLPFC group,  
384 2 out of 12 participants described cTBS as ‘uncomfortable’ whereas the other ten did not report negative  
385 sensations. In the pSTS group, five participants reported negative sensations: four reported the  
386 sensations as ‘uncomfortable’ and one as ‘painful’. Lastly, no one reported other physical adverse effects  
387 (such as dizziness or headaches) that could potentially have been related to the single pulse or cTBS  
388 stimulations.

#### 389 Corticospinal excitability at rest

391 *Experiment 1.* For the control (pre-task = 0.89 mV ± 0.08; post-task = 1.16 mV ± 0.22) and baseline groups  
392 (pre-block 1 = 0.61 mV ± 0.06; between-blocks = 0.79 mV ± 0.18; post-block 2 = 0.87 mV ± 0.17), both  
393 analyses indicated that resting CSE did not change significantly over time (non-significance of TIMING;  
394 both  $F < 167$ , both  $p > 0.21$ , both  $\eta^2_p < 0.09$ ).

395 *Experiment 2.* Both the main effects of GROUP, TIMING as well as their interaction effect were  
396 not significant (all  $p > 0.16$ ) indicating that resting CSE did not differ between groups and did not change  
397 over time (DLPFC: pre-cTBS = 1.16 mV ± 0.26, pre-task = 1.53 mV ± 0.22, post-task = 1.60 mV ± 0.44;  
398 pSTS: pre-CTBS = 2.04 mV ± 0.26, pre-task = 1.60 mV ± 0.22, post-task = 2.20 mV ± 0.44).

#### 400 Corticospinal excitability during the experimental task

401 First of all, we investigated, using the control group, whether our task can elicit weight driven  
402 modulation of CSE during observed object lifting. As shown on figure 3, the analysis substantiated the  
403 validity of our set-up: When the control group observed lifts of the big heavy object (big heavy = 0.07 ±

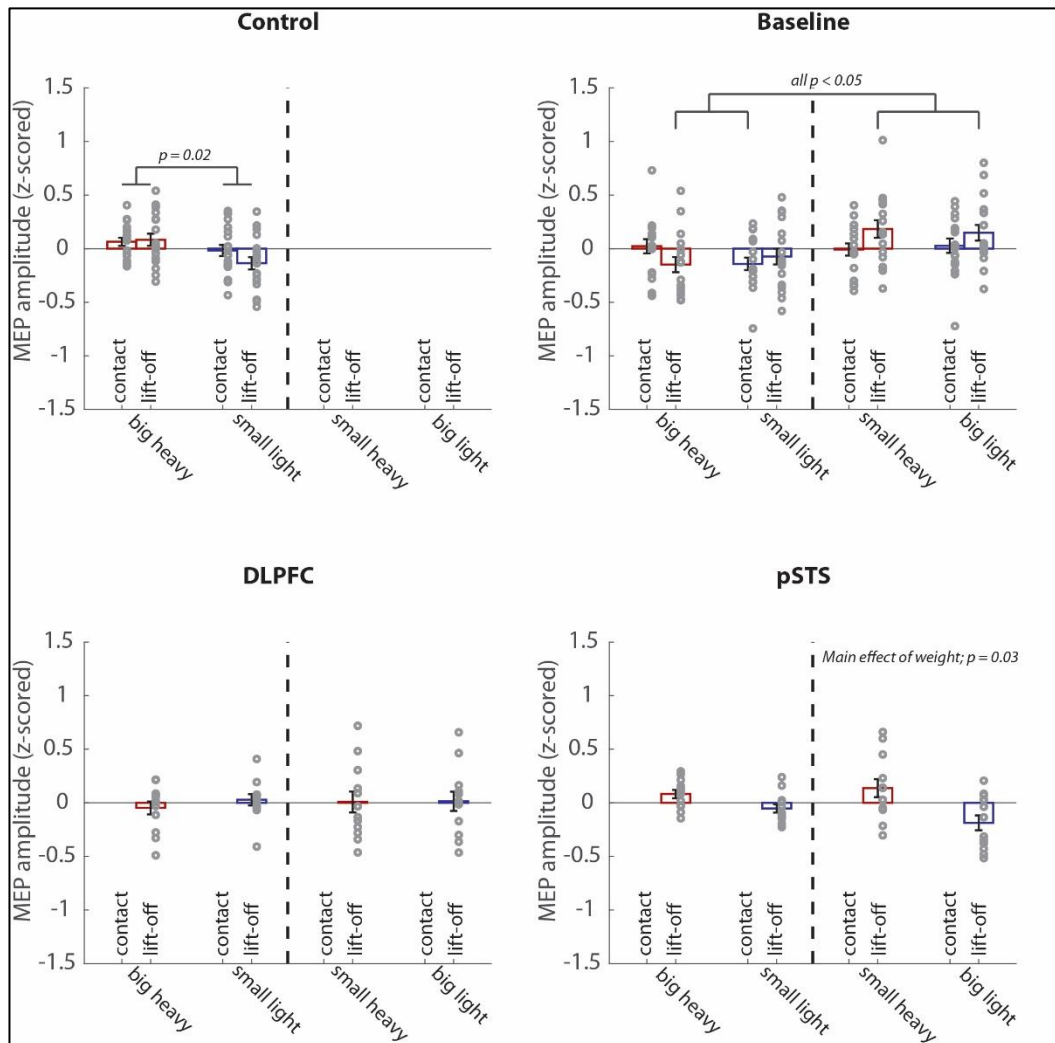

**Figure 3. Modulation of corticospinal excitability during lift observation.** Average MEP values (z-score) during lift observation pooled across participants for each experimental group separately. Left and right of the dashed line on each figure represent the congruent (big heavy and small light) and incongruent objects (small heavy and big light) respectively. Red and blue indicate heavy and light weights respectively. For the control and baseline groups we used two TMS timings during observation, i.e. at observed object contact and after observed lift-off. As such, of two adjacent bars, the first and second one represent MEP values at observed contact and during observed lifting respectively. For the DLPFC and pSTS groups we used only one TMS timing (object lift off). Each circle (scatter) represents the average MEP value for one participant in that specific condition. All data is presented as the mean  $\pm$  SEM. Only significant intra-group differences are shown on these graphs.

404 0.03) CSE was significantly facilitated compared to when they observed lifts of the small light object  
 405 (small light =  $-0.08 \pm 0.03$ ;  $p = 0.02$ ) (main effect of CUBE:  $F_{(1,17)} = 6.87$ ,  $p = 0.02$ ,  $\eta^2_p = 0.29$ ).

406 Second, we explored whether the presence of the incongruent objects affected CSE modulation.  
 407 For this, we compared the control and baseline groups for only the congruent objects. In line with our  
 408 findings for the control group, CSE was significantly facilitated when observing lifts of the big heavy cube

409 (big heavy =  $0.006 \pm 0.02$ ) compared to the small light one (small light =  $-0.09 \pm 0.03$ ;  $p = 0.04$ ) (*main*  
410 *effect of CUBE*:  $F_{(1,33)} = 4.34$ ,  $p = 0.04$ ,  $\eta^2_p = 0.12$ ). However, the main effect of GROUP ( $F_{(1,33)} = 7.30$ ,  $p =$   
411  $0.01$ ,  $\eta^2_p = 0.18$ ) was significant as well: When observing lifts (of the congruent objects) CSE of the  
412 baseline group (congruent objects =  $-0.09 \pm 0.02$ ) was significantly more inhibited than that of the  
413 control group (congruent objects =  $0.00 \pm 0.02$ ). Considering that the group averages for CSE (MEP-  
414 amplitude) are calculated using z-score normalization, these findings indicate that the presence of the  
415 incongruent objects in the baseline experiment should have inhibited CSE modulation for the congruent  
416 objects (due to negative z-score). In addition, this notion of the incongruent object's presence altering  
417 CSE modulation might be supported by the borderline significance of the interaction effect CUBE X  
418 TIMING X GROUP ( $F_{(1,33)} = 3.71$ ,  $p = 0.06$ ,  $\eta^2_p = 0.10$ ).

419 To probe these potential differences between the congruent and incongruent objects for the  
420 baseline group, we decided to perform a separate ANOVA<sub>RM</sub> on the baseline group with within-factors  
421 TIMING, SIZE and WEIGHT. Interestingly, this analysis revealed that CSE modulation in the baseline group  
422 was not driven by SIZE or WEIGHT but by 'congruency'. As shown on figure 3, CSE was significantly more  
423 facilitated for the small heavy object during observed lifting (mean =  $0.18 \pm 0.08$ ) compared to the big  
424 heavy one during observed lifting (mean =  $-0.15 \pm 0.07$ ;  $p = 0.01$ ) and the small light one at observed  
425 contact (mean =  $-0.14 \pm 0.06$ ;  $p = 0.02$ ) (*interaction effect of WEIGHT X SIZE X TIMING*:  $F_{(1,16)} = 7.54$ ,  $p =$   
426  $0.01$ ,  $\eta^2_p = 0.32$ ). Conversely, CSE was significantly more facilitated during observed lifting of the big light  
427 object (mean =  $0.15 \pm 0.08$ ), compared to the big heavy one during observed lifting ( $p = 0.03$ ), and the  
428 small light one at observed contact ( $p = 0.04$ ) (*SIZE X WEIGHT X TIMING*). Importantly, these findings  
429 contradict our initial hypothesis: We expected that motor resonance would be driven by SIZE at  
430 observed contact and afterwards by WEIGHT during observed lifting. However, our results demonstrated  
431 that motor resonance effects driven by size or weight were 'masked' by a mechanism that is monitoring  
432 object congruency, i.e. monitoring a potential mismatch between anticipated and actual object weight.

433 Third, we investigated the potential effects of the virtual lesions on CSE modulation during lift  
434 observation. As described in 'Statistical analysis', we performed a GLM with between-factor GROUP  
435 (baseline, DLPFC and pSTS groups) and within-factors SIZE and WEIGHT. As shown on figure 3, this  
436 analysis revealed that for the pSTS group, CSE was significantly facilitated when observing lifts of heavy  
437 objects, irrespective of their size (heavy objects =  $0.11 \pm 0.05$ ) compared to lifts of the light ones (light  
438 objects =  $-0.12 \pm 0.04$ ;  $p = 0.03$ ) (*interaction effect of GROUP X WEIGHT*:  $F_{(2,38)} = 4.97$ ,  $p = 0.01$ ,  $\eta^2_p = 0.17$ ).  
439 However, this weight-driven modulation of CSE during lift observation was absent for the baseline group  
440 (due to the congruency effect as described above; heavy objects =  $0.02 \pm 0.04$ ; light objects =  $0.04 \pm 0.03$ ;



441  $p = 1.00$ ) but was also absent for the DLPFC group (heavy objects =  $-0.02 \pm 0.05$ ; light objects =  $0.02 \pm$   
442  $0.04$ ;  $p = 1.00$ ) (*GROUP X WEIGHT*). As such, these findings indicate that weight-driven modulation of CSE  
443 during lift observation was restored for the pSTS group. However, these results also indicate that CSE  
444 was not modulated after DLPFC was virtually lesioned.

445 To further investigate the WEIGHT effect in the pSTS group, we performed an additional GLM for  
446 the control and pSTS groups combined. Indeed, if weight-driven modulation of CSE during lift  
447 observation was restored by virtual lesioning of pSTS, then the pSTS group should have not differed  
448 significantly from the control group with respect to the congruent objects. For this analysis, we used the  
449 between-factor GROUP (control and pSTS) and within-factor CUBE (big heavy and small light) for TIMING  
450 being only after observed lift-off (as we did not apply TMS at observed contact in the pSTS group).  
451 Importantly, the main effect of CUBE was significant ( $F_{(1,28)} = 6.43$ ,  $p = 0.02$ ,  $\eta^2_p = 0.19$ ). In line with our  
452 control group findings, CSE was significantly facilitated when observing lifts of the big heavy object (big  
453 heavy =  $0.08 \pm 0.04$ ) compared to observing lifts of the light one (small light =  $-0.09 \pm 0.04$ ;  $p =$   
454  $0.01$ ). Interestingly, this analysis did not show significance for the main effect of GROUP as well as for its  
455 interaction with CUBE (*both*  $F < 0.03$ , *both*  $p > 0.28$ , *both*  $\eta^2_p < 0.04$ ). As such, these findings further  
456 substantiate that in both the control and pSTS group, CSE modulation during lift observation was driven  
457 by the object's actual weight (figure 3).

458 Moreover, we explored whether CSE was still modulated by object weight after virtual lesioning  
459 of DLPFC using the same analysis as described above for the pSTS group (however, the groups in this  
460 analysis are the control and DLPFC groups). Briefly, this analysis failed to reveal significance for any of the  
461 main effects (GROUP and CUBE) as well as their interaction effect (*all*  $F < 3.57$ , *all*  $p > 0.06$ , *all*  $\eta^2_p < 0.11$ )  
462 further substantiating that there is no evidence that CSE was modulated by observed object weight after  
463 virtual lesioning of DLPFC. To ensure that the borderline significant interaction effect was not caused by  
464 the DLPFC group, we performed a final ANOVA<sub>RM</sub> on the DLPFC group with one within-factor CUBE.  
465 Again, this analysis failed to show significance for CUBE ( $F_{(1,11)} = 0.54$ ,  $p = 0.48$ ,  $\eta^2_p = 0.05$ ). In conclusion,  
466 there is no evidence that CSE was modulated during lift observation at all when DLPFC was virtually  
467 lesioned.

468 To end, we investigated whether CSE was modulated differently during lift observation and  
469 planning for the DLPFC and pSTS groups using a GLM with between-factor GROUP and within-factors  
470 ACTION (observation or planning), SIZE and WEIGHT. Interestingly, this analysis showed that CSE was  
471 significantly facilitated when observing or planning lifts of the heavy objects (heavy objects =  $0.03 \pm 0.02$ )  
472 compared to of the light ones (light objects =  $-0.05 \pm 0.02$ ;  $p = 0.02$ ) (*main effect of WEIGHT*:  $F_{(1,22)} = 6.68$ ,

473  $p = 0.02$ ,  $\eta^2_p = 0.23$ ). However, this WEIGHT effects was likely driven by the pSTS group as the significant  
474 interaction effect GROUP X WEIGHT ( $F_{(1,22)} = 5.66$ ,  $p = 0.03$ ,  $\eta^2_p = 0.20$ ) revealed that WEIGHT drove CSE  
475 modulation in the pSTS (heavy objects =  $0.06 \pm 0.02$ ; light objects =  $-0.08 \pm 0.03$ ;  $p = 0.01$ ) but not in the  
476 DLPFC group (heavy objects =  $-0.00 \pm 0.02$ ; light objects =  $-0.01 \pm 0.03$ ;  $p = 1.00$ ). In its turn, the  
477 significant difference between CSE modulation by the heavy and light objects for the pSTS group (GROUP  
478 X WEIGHT) was likely driven by the triple interaction effect GROUP X ACTION X WEIGHT ( $F_{(1,22)} = 4.31$ ,  $p =$   
479  $0.05$ ,  $\eta^2_p = 0.16$ ). Post-hoc exploration of this significant interaction effect revealed that, for the pSTS  
480 group, CSE was significantly facilitated during lift observation of the heavy objects (heavy objects =  $0.11 \pm$   
481  $-0.03$ ) compared to of the light ones (light objects =  $-0.12 \pm 0.03$ ;  $p = 0.04$ ) whereas this difference was  
482 absent during planning (heavy objects =  $0.02 \pm 0.04$ ; light objects =  $-0.04 \pm 0.04$ ;  $p = 1.00$ ). In conclusion,  
483 these findings suggest that CSE was not modulated at all for the pSTS and DLPFC groups during lift  
484 planning (figure 4). As we have no ‘control conditions’ (group without virtual lesioning during lift  
485 planning), these findings cannot be further interpreted.

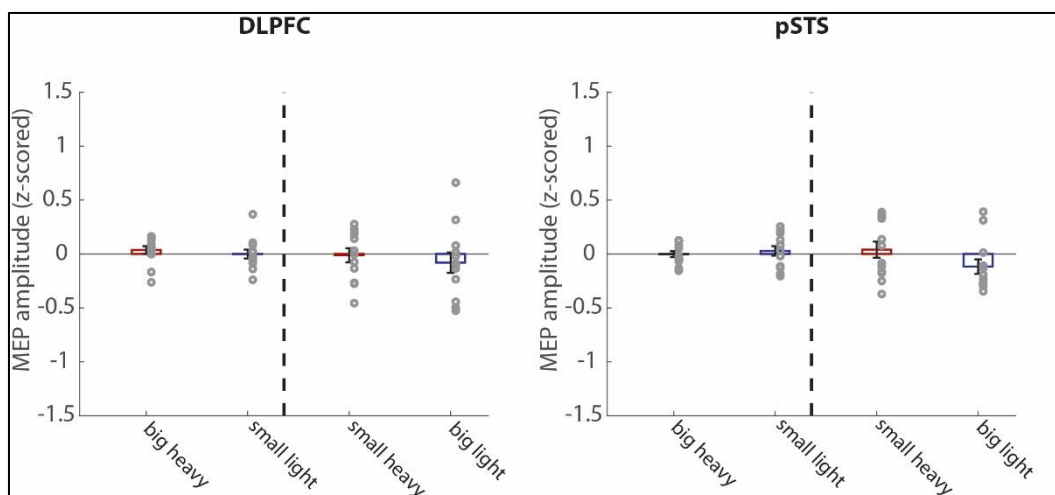

**Figure 4. Modulation of corticospinal excitability during lift planning.** Average MEP values (z-score) during lift planning pooled across participants for the DLPFC and pSTS groups. Left and right of the dashed line on each figure represent the congruent (big heavy and small light) and incongruent objects (small heavy and big light) respectively. Red and blue indicate heavy and light weights respectively. Each circle (scatter) represents the average MEP value for one participant in that specific condition. All data is presented as the mean  $\pm$  SEM.

486 To sum up, our results demonstrate that when participants only interact with objects having a  
487 congruent size-weight relationship (i.e. big-heavy or small-light), CSE during lift observation is modulated  
488 by the object weight as indicated by the size and/or the movement kinematics (control group).  
489 Interestingly, when objects with incongruent size-weight relationship (i.e. big light and small heavy) were  
490 included (baseline group), weight-driven modulation of CSE was ‘suppressed’ and CSE was modulated by

491 'object congruency' instead. That is, CSE was facilitated during observed lifting of objects with  
492 incongruent properties compared to of objects with congruent properties.

493 Moreover, our results also highlighted that virtual lesioning of pSTS abolishes the suppressive  
494 mechanism monitoring the observer's weight expectations and restores weight-driven modulation of  
495 CSE during lift observation. As such, our results provide evidence for the causal involvement of pSTS in  
496 modulating CSE by monitoring the observer's weight expectations during the observation of hand-object  
497 interactions. In addition, virtual lesioning of DLPFC eradicated both the suppressive mechanism as well as  
498 weight-driven motor resonance: During lift observation, CSE was not modulated at all. Accordingly, these  
499 findings suggest that DLPFC is causally involved in a 'general' modulation of CSE during the observation  
500 of hand-object interactions. To end, we did not find significant differences between the DLPFC and pSTS  
501 groups for lift planning. Considering that we have no 'control' group to compare with, these findings  
502 cannot be further interpreted.

503

#### 504 Force parameters of the participants

505 As mentioned before, we pooled all data with respect to factors related to TMS timing as preliminary  
506 analyses revealed that predictive force planning of the participants was not altered by single pulse TMS

507 *Normalized peak grip force rates.* For both the group comparisons on the congruent objects only  
508 (all four groups) and on the objects with both congruency types (baseline, DLPFC and pSTS groups)  
509 neither the main effect of GROUP nor any of its interactions effects were significant (*all  $F < 0.86$ , all  $p >$*   
510  *$0.47$ , all  $\eta^2_p < 0.04$* ).

511 First, for only the congruent objects these findings suggest that there is no evidence that the  
512 experimental groups scaled their grip forces (i.e. peak GFr values) differently, irrespective of whether  
513 they were exposed to only congruent object (control group) or to both congruent and incongruent  
514 objects (baseline, DLPFC and pSTS groups). Second, these findings also provide no evidence that virtual  
515 lesioning of either DLPFC or pSTS (DLPFC and pSTS groups) affected predictive grip force scaling based on  
516 lift observation compared to receiving no virtual lesioning (control and baseline groups). Aside from  
517 these results, all groups increased their grip forces significantly faster for the big heavy cube (big heavy =

518  $0.48 \pm 0.03$ ) than for the small light one (small light =  $-0.43 \pm 0.03$ ) (*main effect of CUBE*: ( $F_{(1,55)} = 353.70$ ,  
519  $p < 0.001$ ,  $\eta^2_p = 0.87$ ). All group averages are shown on figure 5.

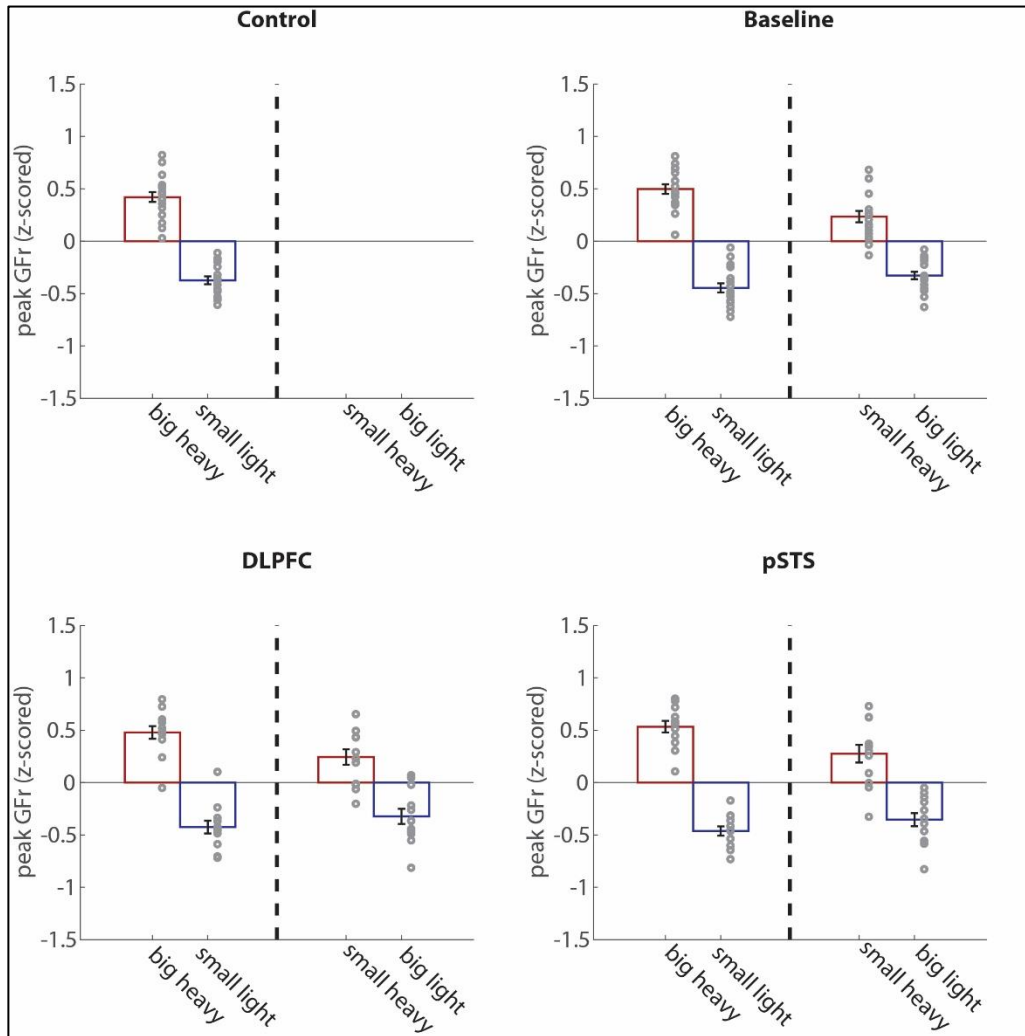

**Figure 5. Peak grip force rates of the participants.** Average peak grip force rate (GFR) value (z-scored) for each group separately. Left and right of the dashed line on each figure represent the congruent (big heavy and small light) and incongruent objects (small heavy and big light), respectively. Red and blue indicate heavy and light weights, respectively. Each circle (scatter) represents the average peak grip force rate value for one participant in that specific condition. All data is presented as the mean  $\pm$  SEM. No intra-group significant differences are shown on this figure.

520 Moreover, these findings are similar for the groups that interacted with both congruent and  
521 incongruent objects. That is, the baseline, DLPFC and pSTS groups increased their grip forces significantly  
522 faster for the heavy objects (heavy =  $0.38 \pm 0.03$ ) than for the light ones (light =  $-0.39 \pm 0.02$ ;  $p < 0.001$ )  
523 (*main effect of WEIGHT*: ( $F_{(1,38)} = 255.93$ ,  $p < 0.001$ ,  $\eta^2_p = 0.87$ ). However, although these groups were  
524 able to scale their grip forces to the actual object weight, they were still biased by the size as they  
525 increased their grip forces significantly faster for the big objects (big objects =  $0.08 \pm 0.02$ ) than for the

526 smaller ones (small objects =  $-0.10 \pm 0.02$ ;  $p < 0.001$ ) (main effect of SIZE: ( $F_{(1,38)} = 23.69$ ,  $p < 0.001$ ,  $\eta^2_p =$   
 527  $0.38$ ). Lastly, post-hoc analysis of the significant interaction effect WEIGHT X SIZE ( $F_{(1,38)} = 5.42$ ,  $p = 0.025$ ,  
 528  $\eta^2_p = 0.12$ ) highlighted that these groups also increased their grip forces significantly faster for the big  
 529 heavy object (big heavy =  $0.50 \pm 0.03$ ) than for the small heavy one (small heavy =  $0.25 \pm 0.04$ ;  $p < 0.001$ ).  
 530 This difference was absent for the light objects (small light =  $-0.44 \pm 0.03$ ; big light =  $-0.34 \pm 0.03$ ;  $p =$   
 531  $0.08$ ).

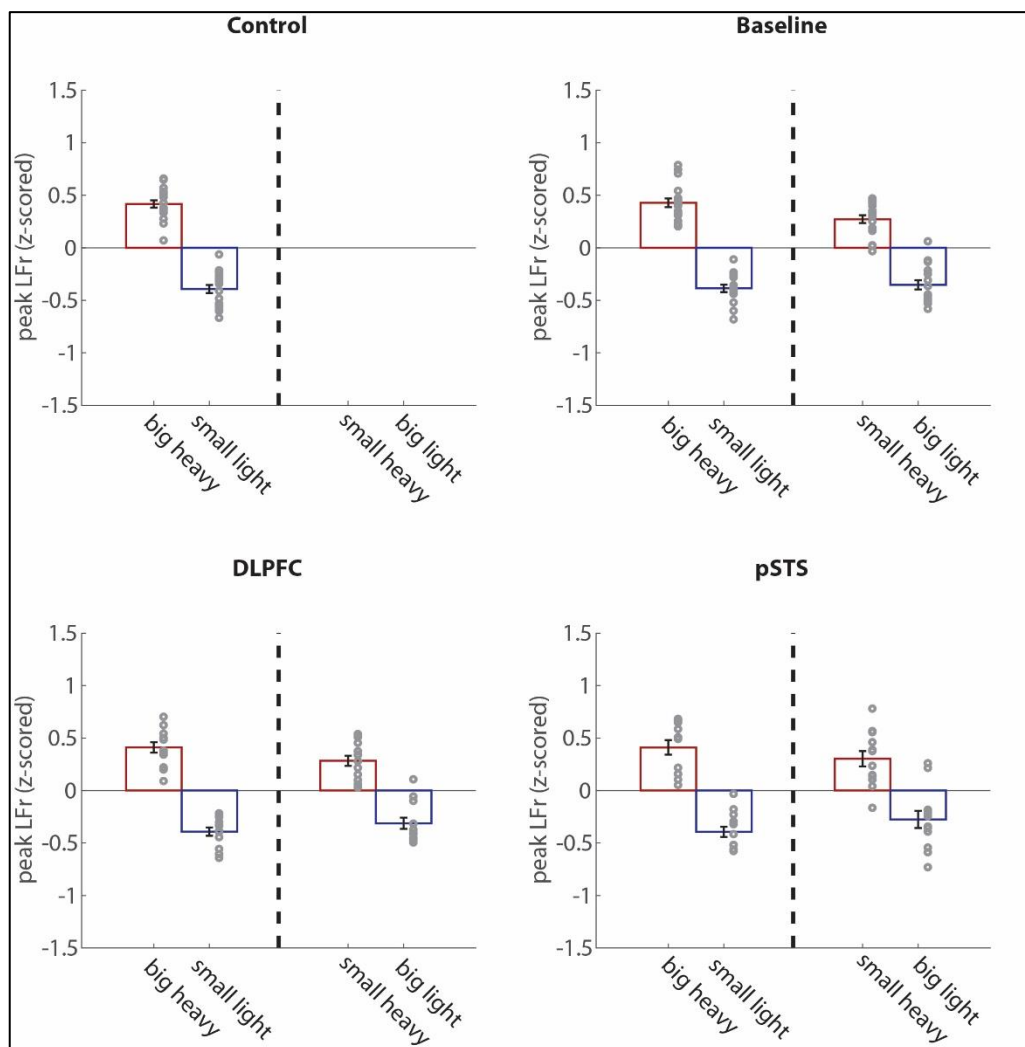

**Figure 6. Peak load force rates of the participants.** Average peak load force rate (LFr) values (z-scored) for each group separately. Left and right of the dashed line on each figure represent the congruent (big heavy and small light) and incongruent objects (small heavy and big light), respectively. Red and blue indicate heavy and light weights, respectively. Each circle (scatter) represents the average peak load force rate value for one participant in that specific condition. All data is presented as the mean  $\pm$  SEM. No intra-group significant differences are shown on this figure.

532 *Normalized peak load force rates.* The findings for peak LFr were nearly identical to those for  
 533 peak GFr. Indeed, for both comparisons [congruent objects only: all groups; both congruent and

534 incongruent objects: baseline, DLPFC and pSTS groups], the main effect of GROUP as well as all its  
535 interactions effects were not significant (*all F < 0.72, all p > 0.49, all  $\eta^2_p < 0.04$* ). Accordingly, we did not  
536 find any evidence that predictive load force planning based on lift observation was affected by (1) the  
537 presence of the incongruent objects (control group vs baseline, DLPFC and pSTS groups) (2) or by the  
538 virtual lesioning of DLPFC or pSTS (control and baseline groups vs DLPFC and pSTS groups). Similar to our  
539 findings for peak GFr, participants increased their load forces significantly faster for the big heavy cube  
540 (big heavy =  $0.42 \pm 0.02$ ) than for the small light one (small light =  $-0.39 \pm 0.02$ ;  $p < 0.001$ ) (*main effect of*  
541 *CUBE: ( $F_{(1,55)} = 339.57, p < 0.001, \eta^2_p = 0.86$ ).*

542 Again, the baseline, DLPFC and pSTS groups, that interacted with both congruent and  
543 incongruent objects, increased their load forces significantly faster for the heavy objects (heavy =  $0.35 \pm$   
544  $0.02$ ) than for the light ones (light =  $-0.35 \pm 0.2$ ;  $p < 0.001$ ) (*main effect of WEIGHT: ( $F_{(1,38)} = 304.80, p <$*   
545  *$0.001, \eta^2_p = 0.89$ )* although they were also biased by object size (big: peak LFr =  $0.05 \pm 0.02$ ; small: peak  
546 LFr =  $-0.05 \pm 0.02$ ;  $p = 0.004$ ) (*main effect of SIZE: ( $F_{(1,38)} = 9.10, p = 0.005, \eta^2_p = 0.19$ )*). All group averages  
547 are shown on figure 6 without intra-group significant differences being shown.

548 *Normalized loading phase duration.* Our findings for the participants' loading phase duration  
549 were identical to those for peak GFr: For congruent objects only (all groups) and the congruent and  
550 incongruent objects combined (baseline, DLPFC and pSTS groups) our analyses did not show significance  
551 for the main effect of GROUP as well as its interaction effects (*all F < 2.07, all p > 0.140, all  $\eta^2_p < 0.10$* ),  
552 again suggesting that our experimental groups did not differ significantly from each other. Again, the  
553 GLM for the congruent objects only showed that the main effect of CUBE was significant ( $F_{(1,55)} =$   
554  $2717.64, p < 0.001, \eta^2_p = 0.90$ ) indicating that all groups lifted the big heavy object (big heavy =  $0.83 \pm$   
555  $0.02$ ) slower than the small light one (small light =  $-0.80 \pm 0.02$ ;  $< 0.001$ ).

556 In line with our peak GFr findings, the groups (baseline, DLPFC and pSTS), interacting with both  
557 congruent and incongruent objects lifted the heavy objects (heavy =  $0.91 \pm 0.03$ ) significantly slower than  
558 the light ones (light =  $-0.80 \pm 0.02$ ;  $p < 0.001$ ) (*main effect of WEIGHT:  $F_{(1,38)} = 1139.85, p < 0.001, \eta^2_p =$*   
559  *$0.97$ )* although they were still biased by the object size as they lifted the big objects faster than the small  
560 ones (big =  $0.01 \pm 0.01$ ; small =  $0.09 \pm 0.02$ ;  $p < 0.001$ ) (*main effect of SIZE:  $F_{(1,38)} = 18.43, p < 0.001, \eta^2_p =$*   
561  *$0.33$* ). Finally, post-hoc analysis of the significant interaction effect WEIGHT X SIZE ( $F_{(1,38)} = 23.33, p <$   
562  $0.001, \eta^2_p = 0.38$ ) revealed that all groups lifted the big heavy object (big heavy =  $0.82 \pm 0.02$ )  
563 significantly faster than the small heavy one (small heavy =  $0.99 \pm 0.04$ ;  $p < 0.001$ ) although this

564 difference was absent for the light objects (small light =  $-0.81 \pm 0.02$ ; big light =  $-0.80 \pm 0.03$ ;  $p = 1.00$ ).

565 All group averages are shown on figure 7 without intra-group significant differences being shown.

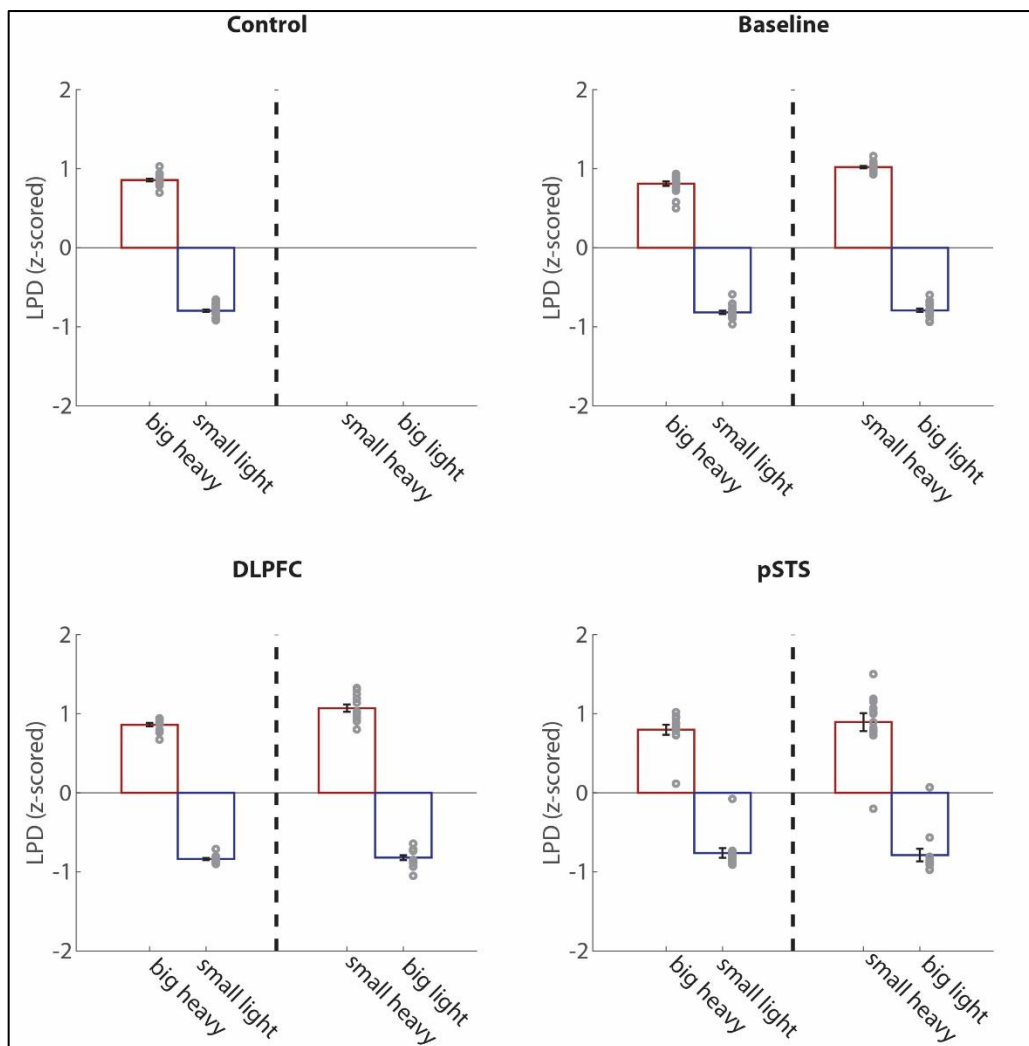

**Figure 7. Loading phase duration of the participants.** Average loading phase duration (LPD) values (z-scored) for each group separately. Left and right of the dashed line on each figure represent the congruent (big heavy and small light) and incongruent objects (small heavy and big light), respectively. Red and blue indicate heavy and light weights, respectively. Each circle (scatter) represents the average loading phase duration for one participant in that specific condition. All data is presented as the mean  $\pm$  SEM. No intra-group significant differences are shown on this figure.

566 To sum up, participants lifted the objects [SIZE: big or small by WEIGHT: heavy or light] in turns  
567 with the actor and were instructed that the object in their trial was always identical, both in terms of size  
568 and weight, to the object the actor lifted in the previous trial. As such, participants could potentially rely  
569 on lift observation to estimate object weight and plan their own lifts accordingly. Importantly, our results  
570 support this notion: In line with Rens and Davare (2019), our results demonstrate that the groups who  
571 interacted with both the congruent and incongruent objects were able to detect the incongruent objects

572 based on observed lifts performed by the actor. Indeed, our findings for the baseline, DLPFC and pSTS  
573 groups showed that subjects scaled their fingertip forces to the actual weight of the incongruent objects  
574 (main effect of WEIGHT). However, it is important to note that these groups were still biased by object  
575 size as, on average, subjects scaled their fingertip forces faster for the large objects than for the small  
576 ones (main effect of SIZE). Moreover, exploration of the significant interaction effect of WEIGHT X SIZE  
577 for peak GFr and LPD indicated that this effect was primarily driven by the significant difference between  
578 heavy objects. Lastly, considering that we did not find significant differences between the baseline group  
579 on one side and the DLPFC and pSTS groups on the other side shows that virtual lesioning of either  
580 region did not affect predictive lift planning based on lift observation. As such, our findings related to the  
581 force parameters indicate that DLPFC and pSTS are not causally involved in neither weight perception  
582 during lift observation nor in updating the motor command based on lift observation.

583  
584 Force parameters of the actor  
585 *Normalized peak grip force rates.* Comparing the congruent objects only across all four groups, the actor  
586 increased his grip forces significantly faster for the big heavy object (big heavy =  $0.8 \pm 0.02$ ) than for the  
587 small light one (small light =  $-0.79 \pm 0.01$ ;  $p < 0.001$ ) (main effect of WEIGHT:  $F_{(1,55)} = 3328$ ,  $p < 0.001$ ,  $\eta^2_p =$   
588  $0.98$ ). Although the main effect of group was not significant, the interaction effect of GROUP X CUBE  
589 ( $F_{(3,55)} = 5.85$ ,  $p = 0.002$ ,  $\eta^2_p = 0.24$ ) was. Post-hoc analysis of this interaction effect showed that the actor  
590 scaled his grip forces significantly faster for the big heavy object in the baseline group (baseline: big  
591 heavy =  $0.89 \pm 0.03$ ) compared to the control group (control: big heavy =  $0.76 \pm 0.03$ ,  $p = 0.02$ ). However,  
592 all other between-group differences in the actor's lifting performance for the big heavy object were not  
593 significant (DLPFC: big heavy =  $0.88 \pm 0.04$ ; pSTS: big heavy =  $0.78 \pm 0.03$ ; all  $p > 0.12$ ). Conversely, this  
594 was identical for the small light object with the actor scaling his grip forces significantly slower for the  
595 small light object in the baseline group (baseline: small heavy =  $-0.84 \pm 0.02$ ) than in the control group  
596 (control: small heavy =  $-0.72 \pm 0.02$ ;  $p = 0.05$ ). Again, all other between-group actor differences for the  
597 small light object were not significant (DLPFC: small light =  $-0.83 \pm 0.03$ ; pSTS: small light =  $-0.76 \pm 0.03$ ;  
598 all  $p > 0.24$ ).

599 For the comparisons including the incongruent objects (baseline, DLPFC and pSTS groups), it is  
600 important to note that the interaction effect SIZE X WEIGHT ( $F_{(1,38)} = 5.52$ ,  $p = 0.02$ ,  $\eta^2_p = 0.13$ ) was  
601 significant. Post-hoc analysis showed that the actor increased his grip forces similarly for the light objects  
602 (small light =  $-0.81 \pm 0.02$ ; big light =  $-0.83 \pm 0.03$ ;  $p = 1.00$ ) but not for the heavy ones (big heavy =  $0.85 \pm$



603 0.02; small heavy =  $0.79 \pm 0.04$ ;  $p = 0.03$ ). As our results indicate that the actor increased his grip forces  
604 slower for the small heavy object suggesting that he was biased by the object's size during his own trials.

605 *Normalized peak load force rates.* In line with our findings for grip force rates, the actor  
606 increased his load forces significantly faster for the big heavy cuboid (big heavy =  $0.80 \pm 0.02$ ) than the  
607 small light one (small light =  $-0.72 \pm 0.02$ ;  $p < 0.001$ ) (congruent objects only: *main effect of CUBE*:  $F_{(1,,55)} =$   
608  $1950.87$ ,  $p < 0.001$ ,  $\eta^2_p = 0.97$ ). Importantly, post-hoc exploration of the significant interaction effect  
609 GROUP X CUBE ( $F_{(3,55)} = 3.87$ ,  $p = 0.01$ ,  $\eta^2_p = 0.17$ ), did not reveal any relevant significant differences in  
610 the actor's performance between groups on the big heavy object (control =  $0.71 \pm 0.04$ ; baseline =  $0.84 \pm$   
611  $0.04$ ; DLPFC =  $0.85 \pm 0.04$ ; pSTS =  $0.79 \pm 0.04$ ; *all*  $p > 0.18$ ) or the small light one (control =  $-0.63 \pm 0.03$ ;  
612 baseline =  $-0.76 \pm 0.03$ ; DLPFC =  $-0.76 \pm 0.04$ ; pSTS =  $-0.71 \pm 0.04$ ; *all*  $p > 0.18$ ).

613 However, the analysis on both the congruent and incongruent objects, showed that the actor  
614 scaled his load forces differently based on object size for both the light objects (small light =  $-0.74 \pm 0.02$ ;  
615 big light =  $-0.82 \pm 0.03$ ;  $p = 0.05$ ) and the heavy ones (big heavy =  $0.83 \pm 0.03$ ; small heavy =  $0.74 \pm 0.04$ ;  $p$   
616 =  $0.04$ ) (*SIZE X WEIGHT*:  $F_{(1,,38)} = 15.40$ ,  $p < 0.001$ ,  $\eta^2_p = 0.29$ ). Finally, it is important to note that neither  
617 the main effect of GROUP nor its interaction effects were significant (*all*  $F < 1.03$ , *all*  $p > 0.37$ , *all*  $\eta^2_p <$   
618  $0.5$ ). As such, we did not find evidence that the actor scaled his load forces differently for the different  
619 experimental groups.

620 *Normalized loading phase duration.* Comparing only the congruent objects across all four groups  
621 showed that LPD of the actor was significantly longer when lifting the big heavy object (big heavy =  $0.76$   
622  $\pm 0.02$ ) than the small light one (small light =  $-0.85 \pm 0.02$ ;  $p < 0.001$ ) (congruent objects only: *main effect*  
623 *of CUBE*:  $F_{(1,55)} = 2883.95$ ,  $p < 0.001$ ,  $\eta^2_p = 0.98$ ). For the comparison on both the congruent and  
624 incongruent objects, the interaction effect SIZE X WEIGHT  $F_{(1,38)} = 57.40$ ,  $p < 0.001$ ,  $\eta^2_p = 0.60$ ) was  
625 significant. Critically, the post-hoc analysis revealed that the actor lifted the small objects significantly  
626 slower than the big ones. That is, the LPD when lifting the big heavy object (big heavy =  $0.76 \pm 0.02$ ) was  
627 significantly shorter than when lifting the small heavy one (small heavy =  $0.89 \pm 0.03$ ;  $p < 0.001$ ).  
628 Accordingly, this significant difference was also present for the light objects (small light =  $-0.84 \pm 0.02$ ;  
629 big light =  $-0.68 \pm 0.02$ ;  $p < 0.001$ ). Although these findings suggest that the actor's lifting speed was  
630 biased by object size, he still lifted the light objects significantly faster than the heavy ones (*SIZE X*  
631 *WEIGHT*: *all*  $p < 0.001$ ).

632 In sum, these findings indicate that, in general, the actor scaled his fingertip forces towards the  
633 actual object weight for both the congruent and incongruent objects. However, it is important to note  
634 that the actor was biased by object size when interacting with the incongruent objects. Across all groups

635 (except the control group which did not interact with the incongruent objects), the actor increased his  
636 fingertip forces faster for the big than for the small objects, resulting in a shorter LPD for the larger  
637 objects. Presumably, as participants were able to lift the objects (of which they could only predict object  
638 weight by relying on the actor's lifting) skilfully, it is plausible that these found differences in the actor's  
639 lifting performance drove the participants' ability to estimate object weight during observed lifting.  
640 Accordingly, these differences in observed lifting performance should also have driven modulation of  
641 CSE. Finally, except for one difference for normalized grip force rates, the actor scaled his fingertip forces  
642 similarly across all groups. Importantly, these findings substantiate that our inter-group differences, with  
643 respect to CSE modulation, are not driven by differences in the actor's lifting performance between  
644 groups but rather by experimental set-up differences [presence of incongruent objects vs. only  
645 congruent objects; virtual lesioning of pSTS or DLPFC vs. no virtual lesion].

646

## 647 **Discussion**

648 In the present study, we investigated how CSE is modulated during observation of lifting actions  
649 (i.e. 'motor resonance'). First, results from our control experiment are in line with previous literature  
650 (Alaerts et al., 2010b, 2010a; Senot et al., 2011): When participants observed lifts of objects with a  
651 congruent only size-weight relationship, CSE was modulated by object weight. However, our results for  
652 the baseline group highlight that these typical bottom-up motor resonance effects are easily suppressed  
653 when participants cannot predict object weight based on size: When participants observed lifts of  
654 objects with congruent and incongruent size-weight relationships, CSE was larger when observing lifts of  
655 incongruent objects, regardless of their size and weight. Interestingly, this suggests that typical motor  
656 resonance effects were biased by an 'expectation monitoring mechanism'. However, we found these  
657 differences at different time points during action observation (figure 3). Arguably, this time difference  
658 indicates that the baseline group was able to perceive the small-light object weight *before* lift-off.  
659 Presumably, participants estimated object weight based on the actor's reaching phase as Eastough and  
660 Edwards (2007) demonstrated that an individual's reaching phase depends on the object's mass.  
661 However, we cannot substantiate this theory as we did not record the actor's reaching phase.

662 In a second experiment, we investigated the causal involvement of top-down inputs in mediating  
663 this expectation monitoring mechanism by inducing virtual lesions to either pSTS or DLPFC. Strikingly,  
664 pSTS virtual lesions abolished the monitoring mechanism and restored weight-driven motor resonance.  
665 Importantly, this suggests that pSTS is pivotal in monitoring weight expectations during lift observation.  
666 In contrast, DLPFC virtual lesions eradicated any modulation of motor resonance. As such, these findings

667 provide evidence that DLPFC is causally involved in modulating motor resonance in general. Finally,  
668 although virtual lesions of either DLPFC or pSTS altered motor resonance, we found no evidence that  
669 predictive force scaling, based on observed visuomotor cues, was affected. Specifically, all subject groups  
670 in both experiments scaled their fingertip forces appropriately. This suggests that adequate motor  
671 planning is not related to the presence of weight-driven motor resonance effects.

672 With respect to our baseline group, it is noteworthy that Alaerts et al. (2010b) showed that,  
673 when participants observed lifts of objects with incongruent properties, motor resonance was still driven  
674 by weight as cued by the movement kinematics. Our results contrast theirs by showing that CSE was  
675 facilitated when observing lifts of incongruent compared to congruent objects. Importantly, our study  
676 differs from Alaerts et al. (2010b) on three major points. First, participants in their study did not interact  
677 with the objects. Second, their participants were not required to respond to the observed videos  
678 (verbally or behaviourally) and third, whereas we used a skewed proportion of congruent and  
679 incongruent trials, they used equal proportions.

680 It is unlikely that our findings for the baseline group are entirely driven by the skewed  
681 proportion: Pezzetta et al. (2018) demonstrated with electroencephalography (EEG) that when  
682 participants observe a larger proportion of erroneous grasping actions, they still elicit the typical activity  
683 related to error monitoring as when smaller proportions were used. Thus, it is likely that the ‘expectation  
684 monitoring mechanism’ in our study is driven by the experimental context rather than by the skewed  
685 proportion. Moreover, it has been demonstrated that motor resonance during lift observation is not  
686 robust and can be altered by semantic object representations (Senot et al., 2011) and observed lifting  
687 performance (Buckingham et al., 2014). In our study, participants were required to respond to the visual  
688 stimuli by lifting the objects themselves. Arguably, the contextual importance of accurately estimating  
689 object weight during lift observation caused the ‘expectation monitoring mechanism’ to suppress  
690 weight-driven motor resonance. As such, our results provide strong evidence that the contextual  
691 differences alter modulation of CSE during lift observation.

692 Generally, it has been considered that motor resonance relies on the putative human mirror  
693 neuron system (hMNS). First discovered in macaque monkeys (di Pellegrino et al., 1992), mirror neurons  
694 are similarly activated when executing or observing the same action and have been argued to underlie  
695 action understanding by ‘mapping’ observed actions onto the cortical representations involved in their  
696 execution (Cattaneo and Rizzolatti, 2009). It has been substantiated that the putative hMNS is primarily  
697 located in M1, ventral premotor cortex (PMv) and anterior intraparietal area (AIP) (Rizzolatti et al.,  
698 2014). Importantly, AIP, PMv and M1 also constitute the cortical grasping network and are pivotal in the

699 planning and execution of grasping actions [for reviews see: Davare et al. (2011) and Gerbella et al.  
700 (2017)] which further substantiates the role of the putative hMNS in action understanding. However, our  
701 results for the control and baseline groups cannot be unified under the theory that motor resonance  
702 represents an automatic mapping of parameters indicating object weight: Whereas our control  
703 experiment supports this theory, our baseline group demonstrated that the automatic mapping can be  
704 easily suppressed. As such, our findings suggest that different mechanisms are involved in modulating  
705 CSE during action observation.

706 In our second experiment, we investigated the origin of the ‘expectation monitoring mechanism’  
707 and found that disrupting pSTS activity restores weight-driven motor resonance. This suggests that pSTS  
708 is causally involved in modulating expectation-driven motor resonance. These findings are plausible as  
709 pSTS is crucial in perceiving biological motion (Grossman et al., 2005), which is indicative of object weight  
710 (Hamilton et al., 2007), and also in monitoring execution errors during action observation (Pelphrey et  
711 al., 2004). Although pSTS does not contain mirror neurons (Hickok, 2009, 2013) and shares no reciprocal  
712 connections with M1 (Iacoboni, 2005; Nelissen et al., 2011), it has access to the putative hMNS through  
713 reciprocal connections with AIP (Nelissen et al., 2011; Galletti and Fattori, 2017). Plausibly, pSTS  
714 modulates CSE through AIP-PMV and PMV-M1 connections (Davare et al., 2011; Nelissen et al., 2011;  
715 Gerbella et al., 2017). Indeed, our results suggest that pSTS monitors the weight expectations during  
716 observed lifting and masks typical motor resonance effects when expectations can be incorrect.  
717 Potentially, virtual lesioning of pSTS abolishes expectation-related input to AIP, restoring the automatic  
718 mapping of observed movement parameters. In addition, when expectations are never tested (control  
719 group), pSTS might not provide this top-down input and does not mask weight-driven motor resonance.  
720 However, future research is necessary to substantiate this theory. Finally, our results also suggest that  
721 pSTS does not mediate weight perception as the virtual lesion did not affect predictive lift planning.

722 We also investigated the causal involvement of DLPFC in monitoring weight expectations: Our  
723 results suggest that virtual lesioning of DLPFC eradicated not only the expectation monitoring  
724 mechanism but also weight-driven motor resonance. As such, our results argue that DLPFC is pivotal in  
725 modulating CSE during lift observation, irrespective of the underlying mechanism. Interestingly, our  
726 results align with those of Ubaldi et al. (2015): They showed that when motor resonance effects were  
727 altered by a visuomotor training task, the trained resonance could be eradicated by virtual lesioning of  
728 DLPFC, suggesting that DLPFC is critical in modulating rule-based motor resonance. Importantly, our  
729 results extend on theirs by demonstrating that virtual lesioning of DLPFC eradicates not only trained  
730 responses but also those which are considered to be automatic. It is plausible that DLPFC can modulate

731 motor resonance: Although it has been considered that DLPFC does not contain mirror neurons (Hickok,  
732 2009, 2013), it is reciprocally connected with PMv (Badre and D’Esposito, 2009) and is involved in action  
733 observation and processing contextual information (Raos and Savaki, 2017; Rozzi and Fogassi, 2017).  
734 Finally, in line with the findings for the pSTS group, virtual lesioning of DLPFC did not affect predictive lift  
735 planning.

736 A limitation of the present study is that we only used one TMS timing in the virtual lesion groups,  
737 due to time constrains. We only probed motor resonance after observed lift-off as we found the  
738 strongest effects of the suppressive mechanisms for our baseline group at this timing. In addition, Ubaldi  
739 et al. (2015) demonstrated that motor resonance driven by visuomotor associations is only altered late  
740 but not early during movement observation. Therefore, it seemed valid to focus on the late timing. A  
741 second limitation concerns the absence of sham cTBS in experiment 2. However, virtual lesioning of  
742 DLPFC and pSTS modulated CSE differently indicating that the stimulation site was of importance. Lastly,  
743 probing motor resonance when observing lifts of congruent objects only, combined with virtual lesions  
744 of DLPFC or pSTS, could further substantiate the findings of the present study.

745 In conclusion, the present study demonstrates that motor resonance effects are not robust but  
746 influenced by the cognitive context. We argue that motor resonance should be carefully interpreted in  
747 light of the putative hMNS functional roles. Our results indicate that bottom-up motor resonance effects,  
748 driven by observed movement parameters, can only be measurable when top-down inputs from pSTS  
749 are not triggered by expectation monitoring mechanisms. Moreover, DLPFC is pivotal in the global  
750 modulation of CSE during action observation. Altogether, these findings shed new light on the  
751 theoretical framework in which motor resonance effects occur and overlap with other cortical processing  
752 essential for the sensorimotor control of movements.

753

## 754 **Bibliography**

755 Alaerts, K.; Senot, P.; Swinnen, S. P.; Craighero, L.; Wenderoth, N.; Fadiga, L. Force Requirements of  
756 Observed Object Lifting Are Encoded by the Observer’s Motor System: A TMS Study. *Eur. J. Neurosci.*  
757 **2010a**, *31* (6), 1144–1153.

758 Alaerts, K.; Swinnen, S. P.; Wenderoth, N. Observing How Others Lift Light or Heavy Objects: Which  
759 Visual Cues Mediate the Encoding of Muscular Force in the Primary Motor Cortex? *Neuropsychologia*  
760 **2010b**, *48* (7), 2082–2090.

761 Alaerts, K.; de Beukelaar, T. T.; Swinnen, S. P.; Wenderoth, N. Observing How Others Lift Light or Heavy  
762 Objects: Time-Dependent Encoding of Grip Force in the Primary Motor Cortex. *Psychol. Res.* **2012**, *76* (4),

763 503–513.

764 Arfeller, C.; Schwarzbach, J.; Ubaldi, S.; Ferrari, P.; Barchiesi, G.; Cattaneo, L. Whole-Brain Haemodynamic  
765 After-Effects of 1-Hz Magnetic Stimulation of the Posterior Superior Temporal Cortex During Action  
766 Observation. *Brain Topogr.* **2013**, 278–291.

767 Badre, D.; D’Esposito, M. Is the Rostro-Caudal Axis of the Frontal Lobe Hierarchical? *Nat. Rev. Neurosci.*  
768 **2009**, 10 (9), 659–669.

769 Baugh, L. a.; Kao, M.; Johansson, R. S.; Flanagan, J. R. Material Evidence: Interaction of Well-Learned  
770 Priors and Sensorimotor Memory When Lifting Objects. *J. Neurophysiol.* **2012**, 108, 1262–1269.

771 Buckingham, G.; Wong, J. D.; Tang, M.; Gribble, P. L.; Goodale, M. A. Observing Object Lifting Errors  
772 Modulates Cortico-Spinal Excitability and Improves Object Lifting Performance. *Cortex* **2014**, 50, 115–  
773 124.

774 Castiello, U. The Neuroscience of Grasping. *Nat. Rev. Neurosci.* **2005**, 6 (9), 726–736.

775 Cattaneo, L.; Rizzolatti, G. The Mirror Neuron System. *Arch. Neurol.* **2009**, 66 (5), 557–560.

776 Cattaneo, L.; Sandrini, M.; Schwarzbach, J. State-Dependent TMS Reveals a Hierarchical Representation  
777 of Observed Acts in the Temporal , Parietal , and Premotor Cortices. *Cereb. Cortex* **2010**, No. September.

778 Davare, M.; Kraskov, A.; Rothwell, J. C.; Lemon, R. N. Interactions between Areas of the Cortical Grasping  
779 Network. *Curr. Opin. Neurobiol.* **2011**, 21 (4), 565–570.

780 Duque, J.; Greenhouse, I.; Labruna, L.; Ivry, Ri. Physiological Markers of Motor Inhibition during Human  
781 Behavior. *Trends Neurosci.* **2017**.

782 Eastough, D.; Edwards, M. G. Movement Kinematics in Prehension Are Affected by Grasping Objects of  
783 Different Mass. *Exp. Brain Res.* **2007**, 176 (1), 193–198.

784 Fadiga, L.; Fogassi, L.; Pavesi, G.; Rizzolatti, G. Motor Facilitation During Action Observation: A Magnetic  
785 Stimulation Study. *J. Neurophysiol.* **1995**, 73 (6), 2608–2611.

786 Galletti, C.; Fattori, P. The Dorsal Visual Stream Revisited: Stable Circuits or Dynamic Pathways? *Cortex*  
787 **2017**, 1–15.

788 Gerbella, M.; Rozzi, S.; Rizzolatti, G. The Extended Object-Grasping Network. *Exp. Brain Res.* **2017**, 235  
789 (10), 2903–2916.

790 Gordon; Forssberg; Johansson; Westling. Visual Size Cues in the Programming of Manipulative Forces  
791 during Precision Grip. *Exp. Brain Res.* **1991**, 83 (3), 447–482.

792 Grossman, E. D.; Battelli, L.; Pascual-Leone, A. Repetitive TMS over Posterior STS Disrupts Perception of  
793 Biological Motion. *Vision Res.* **2005**, 45 (22), 2847–2853.

794 Hamilton, A. F. D. C.; Joyce, D. W.; Flanagan, J. R.; Frith, C. D.; Wolpert, D. M. Kinematic Cues in

- 795 Perceptual Weight Judgement and Their Origins in Box Lifting. *Psychol. Res.* **2007**, *71* (1), 13–21.
- 796 Hickok, G. Eight Problems for the Mirror Neuron Theory of Action Understanding in Monkeys and  
797 Humans. *J. Cogn. Neurosci.* **2009**, *21* (7), 1229–1243.
- 798 Hickok, G. Do Mirror Neurons Subserve Action Understanding? *Neurosci. Lett.* **2013**, 6–8.
- 799 Huang, Y.; Edwards, M. J.; Rounis, E.; Bhatia, K. P.; Rothwell, J. C. Theta Burst Stimulation of the Human  
800 Motor Cortex. *Neuron* **2005**, *45*, 201–206.
- 801 Iacoboni, M. Neural Mechanisms of Imitation. *Curr. Opin. Neurobiol.* **2005**.
- 802 Johansson, R.; Westling, G. Coordinated Isometric Muscle Commands Adequately and Erroneously  
803 Programmed for the Weight during Lifting Task with Precision Grip. *Exp. Brain Res.* **1988a**, *71* (1), 59–71.
- 804 Johansson, R. S.; Westling, G. Programmed and Triggered Actions to Rapid Load Changes during Precision  
805 Grip. *Exp. Brain Res.* **1988b**, *71* (1), 72–86.
- 806 Jung, N. H.; Delvendahl, I.; Kuhnke, N. G.; Hauschke, D.; Stolle, S.; Mall, V. Navigated Transcranial  
807 Magnetic Stimulation Does Not Decrease the Variability of Motor-Evoked Potentials. *Brain Stimul.* **2010**,  
808 *3* (2), 87–94.
- 809 Kilner, J. M. More than One Pathway to Action Understanding. *Trends Cogn. Sci.* **2012**, *15* (8), 352–357.
- 810 Miller, E. K.; Cohen, J. D. An Integrative Theory of Prefrontal Cortex. **2001**, 167–202.
- 811 Mylius, V.; Ayache, S. S.; Ahdab, R.; Farhat, W. H.; Zouari, H. G.; Belke, M.; Brugières, P. Definition of  
812 DLPFC and M1 According to Anatomical Landmarks for Navigated Brain Stimulation: Inter-Rater  
813 Reliability, Accuracy, and Influence of Gender and Age. *Neuroimage* **2013**, *78*, 224–232.
- 814 Nelissen, K.; Borra, E.; Gerbella, M.; Rozzi, S.; Luppino, G.; Vanduffel, W.; Rizzolatti, G.; Orban, G. A.  
815 Action Observation Circuits in the Macaque Monkey Cortex. *J. Neurosci.* **2011**, *31* (10), 3743–3756.
- 816 Oldfield, R. C. The Assessment and Analysis of Handedness: The Edinburgh Inventory. *Neuropsychologia.*  
817 1971, pp 97–113.
- 818 Pazzaglia, M.; Smania, N.; Corato, E.; Aglioti, S. M.; Psicologia, D.; Sapienza, L.; Lucia, F. S. Neural  
819 Underpinnings of Gesture Discrimination in Patients with Limb Apraxia. **2008**, *28* (12), 3030–3041.
- 820 di Pellegrino, G.; Fadiga, L.; Fogassi, L.; Gallese, V.; Rizzolatti, G. Understanding Motor Events: A  
821 Neurophysiological Study. *Exp. Brain Res.* **1992**, *91* (1), 176–180.
- 822 Pelphrey, K. A.; Morris, J. P.; McCarthy, G. Grasping the Intentions of Others: The Perceived Intentionality  
823 of an Action Influences Activity in the Superior Temporal Sulcus during Social Perception. *J. Cogn.*  
824 *Neurosci.* **2004**, 1706–1716.
- 825 Pezzetta, X. R.; Nicolardi, V.; Tidoni, E.; Aglioti, S. M. Error , Rather than Its Probability , Elicits Specific  
826 Electrocortical Signatures : A Combined EEG-Immersive Virtual Reality Study of Action Observation. *J.*

827 *Neurophysiol.* **2018**, 1107–1118.

828 Raos, V.; Savaki, H. E. The Role of the Prefrontal Cortex in Action Perception. *Cereb. Cortex* **2017**, No.

829 October, 4677–4690.

830 Rens, G.; Davare, M. Observation of Both Skilled and Erroneous Object Lifting Can Improve Predictive

831 Force Scaling in the Observer. *Front. Hum. Neurosci.* **2019**, *13* (October), 1–13.

832 Rizzolatti, G.; Cattaneo, L.; Fabbri-destro, M.; Rozzi, S. Cortical Mechanisms Underlying the Organization

833 of Goal-Directed Actions and Mirror Neuron-Based Action Understanding. *Physiol. Rev.* **2014**, 655–706.

834 Rossi, S.; Hallett, M.; Rossini, P. M.; Pascual-leone, A. Screening Questionnaire before TMS: An Update.

835 *Clin. Neurophysiol.* **2011**, *122* (8), 1686.

836 Rozzi, S.; Fogassi, L. Neural Coding for Action Execution and Action Observation in the Prefrontal Cortex

837 and Its Role in the Organization of Socially Driven Behavior. **2017**, *11* (September), 1–9.

838 Senot, P.; D’Ausilio, A.; Franca, M.; Caselli, L.; Craighero, L.; Fadiga, L. Effect of Weight-Related Labels on

839 Corticospinal Excitability during Observation of Grasping: A TMS Study. *Exp. Brain Res.* **2011**, *211* (1),

840 161–167.

841 Tidoni, E.; Borgomaneri, S.; di Pellegrino, G.; Avenanti, A. Action Simulation Plays a Critical Role in

842 Deceptive Action Recognition. *J. Neurosci.* **2013**, *33* (2), 611–623.

843 Ubaldi, S.; Barchiesi, G.; Cattaneo, L. Bottom-up and Top-down Visuomotor Responses to Action

844 Observation. *Cereb. Cortex* **2015**, *25* (4), 1032–1041.

845
